# Supplementary material for: Evolution analysis of V2O5·nH2O gels for preparation of xerogels having a high specific surface area and their replicas
Source: Royal Society of Chemistry journal article supplement (doi:10.1039/c7ra06850f), 2017-01-01
Supplement: c7ra06850f1.pdf [file c7ra06850f1.pdf]

## Evolution analysis of $V_2O_5 \cdot nH_2O$ gels for preparation of xerogels having a high-specific surface area and their replicas

Kanji Ishii, Yuki Kimura, Tomoya Yamazaki, Yuya Oaki and Hiroaki Imai

### SUPPORTING INFORMATION

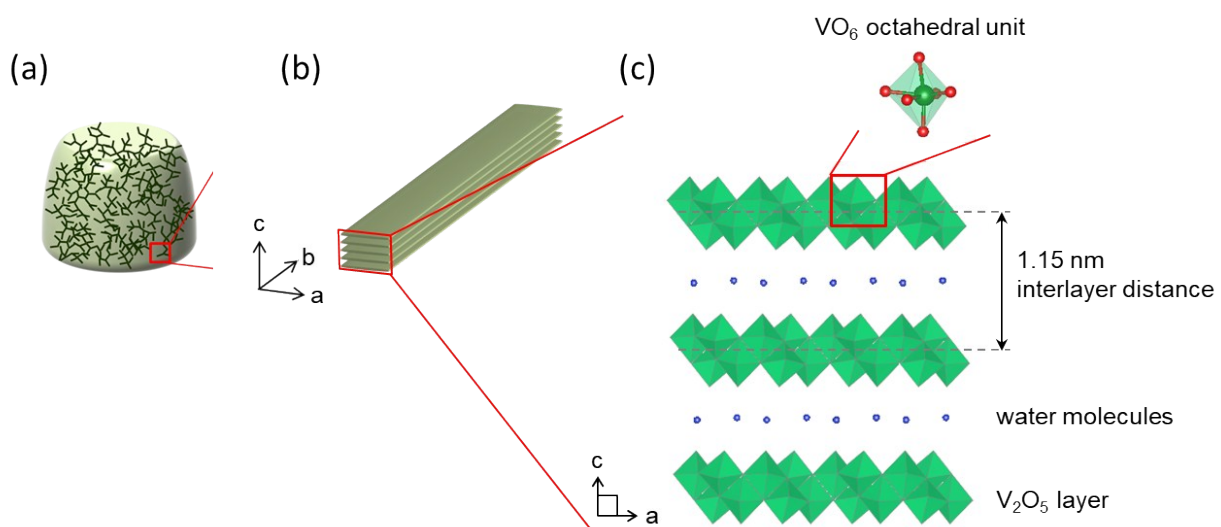

**Figure S1.** Schematic illustrations of a  $V_2O_5 \cdot nH_2O$  gel (a),  $V_2O_5 \cdot nH_2O$  nanofiber (b), and crystal structure of  $V_2O_5 \cdot nH_2O$  (c).

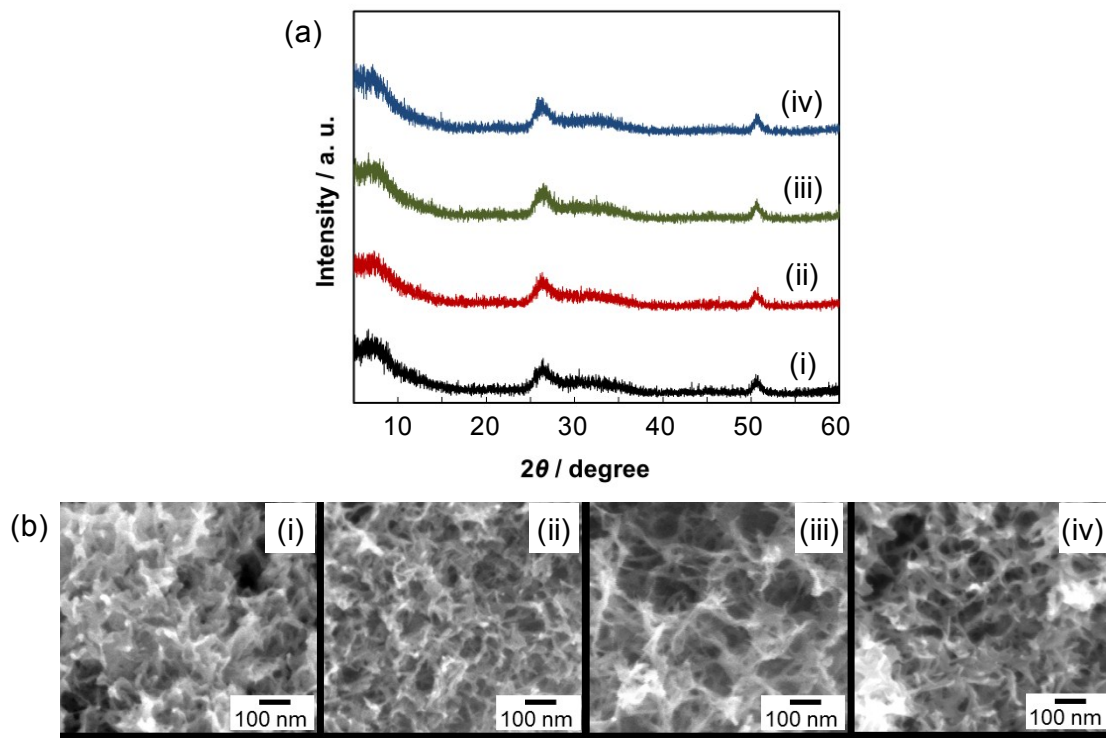

**Figure S2.** XRD patterns (a) and SEM images (b) of  $V_2O_5 \cdot nH_2O$  xerogels ( $[VO(OiPr)_3]/[H_2O] = 1/5$ ) after aging for 24 h (i), 48 h (ii), 96 h (iii), and 192 h (iv).

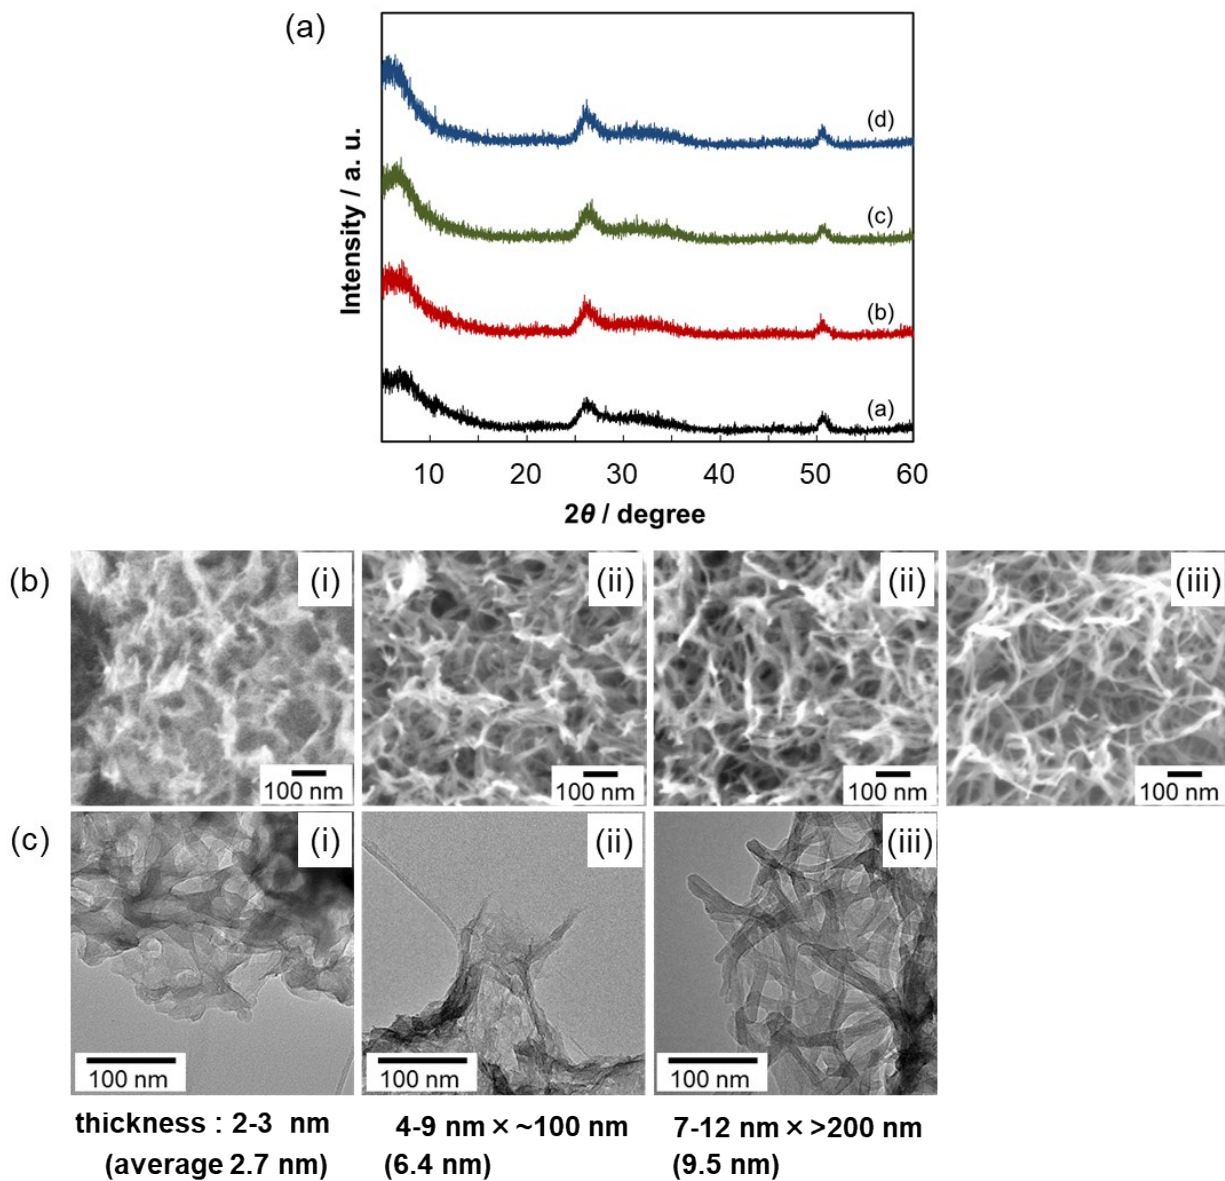

**Figure S3.** XRD patterns (a) and SEM (b) and TEM (c) images of  $V_2O_5 \cdot nH_2O$  xerogels ( $[VO(OiPr)_3]/[H_2O] = 1/10$ ) after aging for 24 (i), 48 (ii), 96 (iii), and 192 h (iv).

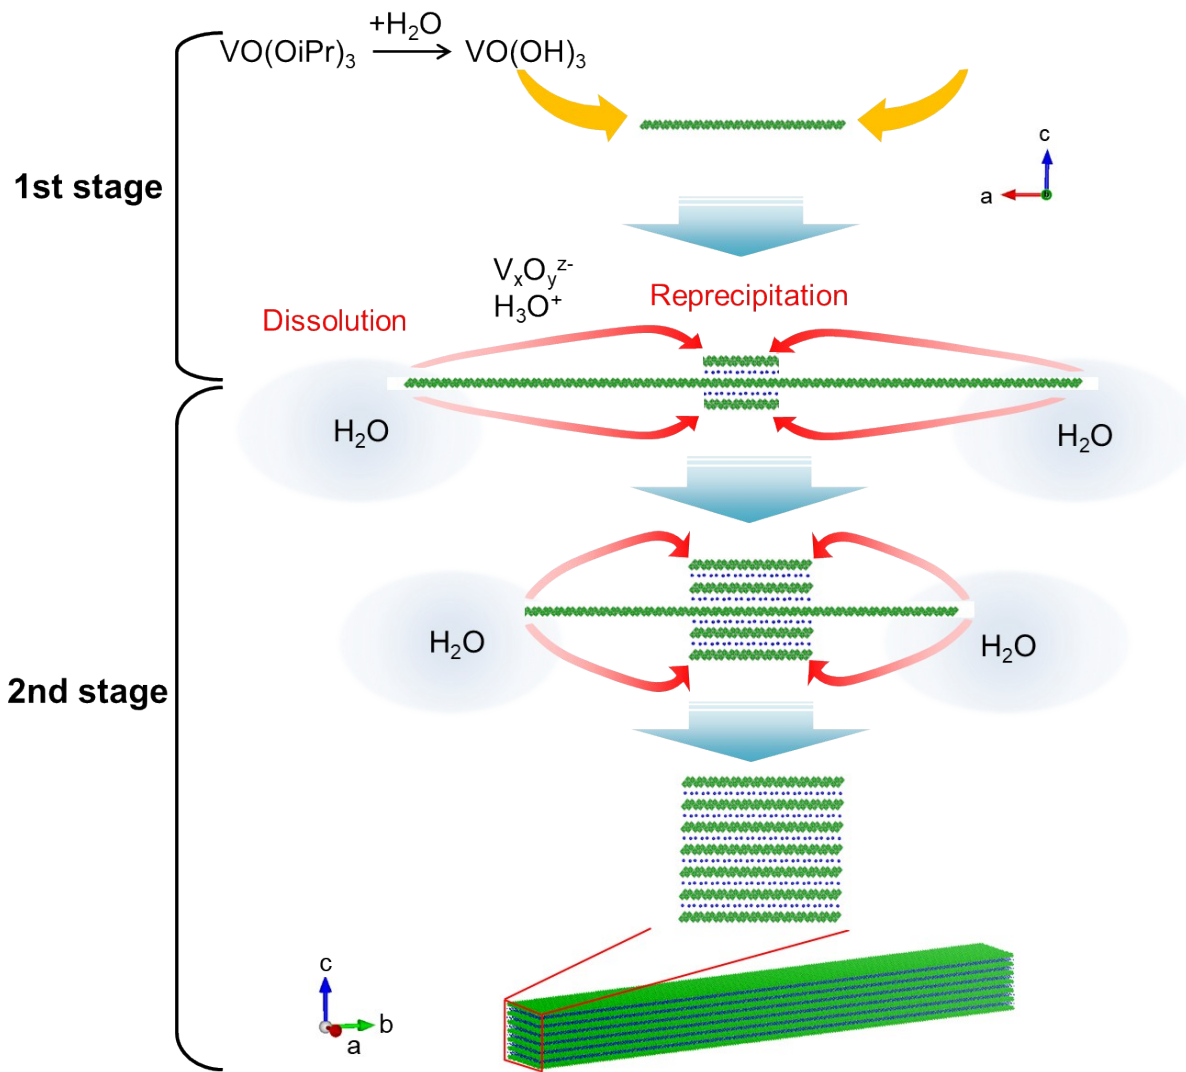

**Figure S4.** Schematic illustration of the evolution mechanism of ultrathin films and thin fibrils. In the first stage, the  $\text{V}_2\text{O}_5$  layers expand by deposition of  $\text{VO(OH)}_3$ , which is produced by hydrolysis of  $\text{VO(OiPr)}_3$ , at the edges of the ultrathin films. In the second stage, polyvanadate anions that are supplied by dissolution of the edge of the ultrathin films stack on the  $\text{V}_2\text{O}_5$  layers with interlayer water.

**Table S1.** BET surface areas of  $V_2O_5 \cdot nH_2O$  xerogels.

| Aging [h] | [VO(OiPr) <sub>3</sub> ]/[H <sub>2</sub> O] [m <sup>2</sup> /g] |      |     |
|-----------|-----------------------------------------------------------------|------|-----|
|           | 1/40                                                            | 1/10 | 1/5 |
| 0.5       | 191                                                             |      |     |
| 2         | 320                                                             |      |     |
| 24        | 207                                                             | 258  | 278 |
| 48        | 205                                                             | 240  | 162 |
| 96        | 262                                                             | 289  | 292 |
| 192       |                                                                 | 272  | 255 |

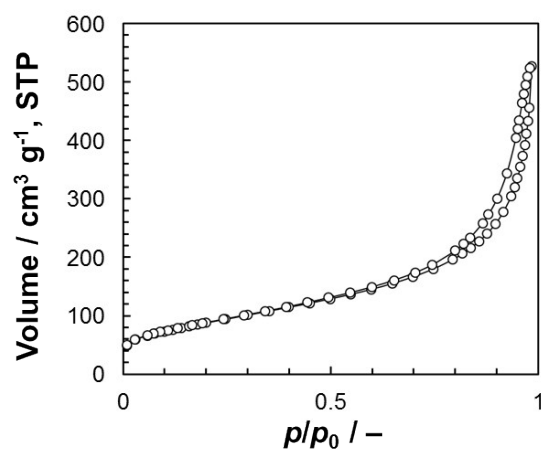

**Figure S5.** N<sub>2</sub> adsorption/desorption isotherms of  $V_2O_5 \cdot nH_2O$  xerogels ([VO(OiPr)]/[H<sub>2</sub>O] = 1/40) after aging for 2.0 h.

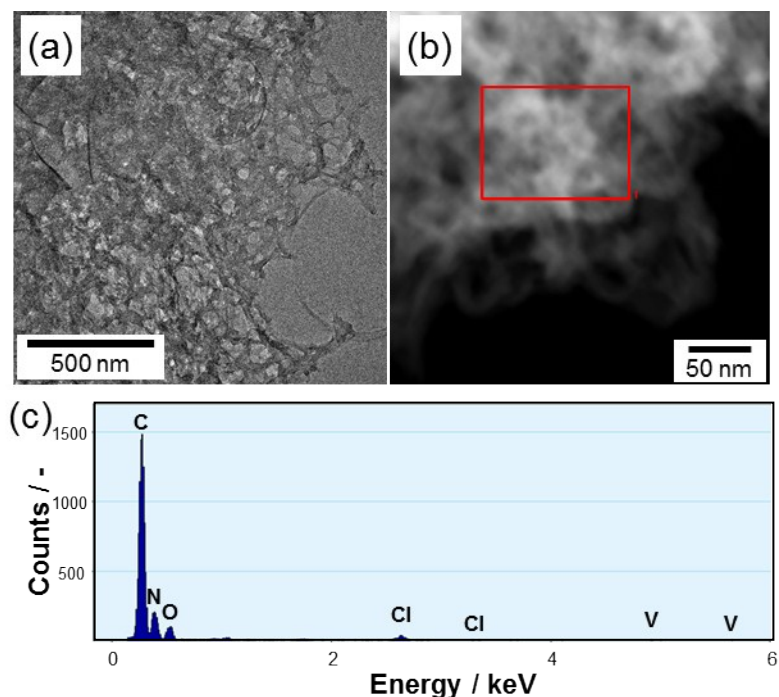

**Figure S6.** TEM (a) and HAADF-STEM (High-Angle Annular Dark Field Scanning TEM) (b) images and EDX spectrum (c) of PPy replicas of  $V_2O_5 \cdot nH_2O$  xerogels. The measured area is displayed with red square in the HAADF-STEM image.

### Preparation procedure of chemical polymerization of polypyrrole

Anhydrous ferric chloride ( $FeCl_3$ ) as an oxidant, pyrrole, and water as a solvent were used in this experiment. Pyrrole was added to the aqueous solution of  $FeCl_3$  and kept at room temperature with stirring for 24 h. The concentration of pyrrole varied from 18-72  $mmol\ dm^{-3}$  and the molar ratio of  $[pyrrole]/[FeCl_3]$  was fixed at 1/4. The reaction product was filtered and washed thoroughly with  $HCl_{aq}$  and dried at 60 C at ambient pressure.
